# Supplementary material for: Certification of UK gastrointestinal endoscopists and variations between trainee specialties: results from the JETS e-portfolio
Source: PubMed Central journal article supplement — Endosc Int Open. 2019 Apr 4;7(4):E551–60. doi: 10.1055/a-0839-4476 (PMC6449159; doi:10.1055/a-0839-4476), 2019-04-04
Supplement: 1288supmat-10-1055-a-0839-4476.pdf [file 1288supmat-10-1055-a-0839-4476.pdf]

## SUPPLEMENTARY FILES

| Criteria                                                                                                                                                                                                                                                                                                       | Requirement |
|----------------------------------------------------------------------------------------------------------------------------------------------------------------------------------------------------------------------------------------------------------------------------------------------------------------|-------------|
| D2 intubation                                                                                                                                                                                                                                                                                                  | ≥95%        |
| J manoeuvre                                                                                                                                                                                                                                                                                                    | ≥95%        |
| Unassisted physically (the trainer does not take the scope)                                                                                                                                                                                                                                                    | ≥95%        |
| Basic skills course                                                                                                                                                                                                                                                                                            | Attended    |
| Recommend lifetime procedures                                                                                                                                                                                                                                                                                  | ≥200        |
| Procedures in previous 3 months                                                                                                                                                                                                                                                                                | ≥15         |
| Lifetime formative upper GI DOPS<br>Trainees are recommended to complete DOPS throughout training, 1 DOPS form for every 10 cases                                                                                                                                                                              | ≥20         |
| 5 most recent formative upper GI DOPS scoring 'competent for independent practice'.<br>DOPS forms must be completed within 12 months of application for certification. Up to 10% can score 'minimal supervision'. No item in the last 5 DOPS can be scored 'maximum supervision' or 'significant supervision'. | ≥90%        |

**Appendix Table 1:** Eligibility criteria for diagnostic gastroscopy certification. *These are required to trigger summative assessment.*

| Criteria                                                                                                                                                                                                                                                                                                                | Requirement |
|-------------------------------------------------------------------------------------------------------------------------------------------------------------------------------------------------------------------------------------------------------------------------------------------------------------------------|-------------|
| Unassisted physically (the trainer does not take the scope)                                                                                                                                                                                                                                                             | ≥90%        |
| Completion of Basic skills lower GI course                                                                                                                                                                                                                                                                              | Attended    |
| Recommended lifetime procedure count<br>(both colonoscopies and flexible sigmoidoscopies will be counted towards the lifetime procedure count)                                                                                                                                                                          | ≥200        |
| Number of flexible sigmoidoscopies                                                                                                                                                                                                                                                                                      | ≥100        |
| Procedures in previous 3 months                                                                                                                                                                                                                                                                                         | ≥15         |
| Lifetime formative lower GI DOPS<br>Trainees are recommended to complete DOPS throughout training, 1 DOPS form for every 10 cases                                                                                                                                                                                       | ≥20         |
| 5 most recent formative lower GI DOPS scoring 'competent for independent practice'.<br>-DOPS forms must be completed within 12 months of application for certification.<br>-Up to 10% can score 'minimal supervision'.<br>-No item in the last 5 DOPS can be scored 'maximum supervision' or 'significant supervision'. | ≥90%        |
| Formative DOPyS (level 1)<br>A level 1 DOPyS records a polyp which is less than 10mm in size.                                                                                                                                                                                                                           | ≥4          |
| 4 most recent formative lower GI DOPyS (level 1) all items scoring 'Competent for independent practice'                                                                                                                                                                                                                 | 100%        |

**Appendix Table 2:** Eligibility criteria for flexible sigmoidoscopy certification. *These are required to trigger summative assessment. Flexible sigmoidoscopy certification is not required once a trainee has received provisional certification in colonoscopy.*

| Criteria for provisional certification                                                                                                                                                                                                                                                                                  | Requirement |
|-------------------------------------------------------------------------------------------------------------------------------------------------------------------------------------------------------------------------------------------------------------------------------------------------------------------------|-------------|
| Caecal intubation rate                                                                                                                                                                                                                                                                                                  | ≥ 90%       |
| Unassisted physically (the trainer does not take the scope)                                                                                                                                                                                                                                                             | ≥ 90%       |
| Basic skills lower GI course                                                                                                                                                                                                                                                                                            | Attended    |
| Total lifetime procedure count                                                                                                                                                                                                                                                                                          | ≥200        |
| Procedures in last 3 months                                                                                                                                                                                                                                                                                             | ≥15         |
| Lifetime formative lower GI DOPS<br>Trainees are recommended to complete DOPS throughout training, 1 DOPS form for every 10 cases                                                                                                                                                                                       | ≥20         |
| 5 most recent formative lower GI DOPS scoring 'competent for independent practice'.<br>-DOPS forms must be completed within 12 months of application for certification.<br>-Up to 10% can score 'minimal supervision'.<br>-No item in the last 5 DOPS can be scored 'maximum supervision' or 'significant supervision'. | ≥90%        |
| Formative DOPyS (level 1)                                                                                                                                                                                                                                                                                               | ≥4          |
| 4 most recent formative lower GI DOPyS (level 1) all items scoring 'Competent for independent practice'                                                                                                                                                                                                                 | 100%        |

**Appendix Table 3:** Eligibility criteria for provisional colonoscopy certification. *These are required to trigger summative assessment.*

| Criteria for full criteria                                                                              | Requirement                        |
|---------------------------------------------------------------------------------------------------------|------------------------------------|
| Colon provisional certification                                                                         | Granted                            |
| Caecal intubation rate                                                                                  | ≥90%                               |
| Unassisted (physically)                                                                                 | ≥90%                               |
| Polyp detection and removal                                                                             | ≥10%                               |
| Sedation rate for patients aged under 70 years old.                                                     | ≤5mgs midazolam                    |
| Sedation rate for patients aged 70 or over                                                              | ≤2.5mgs midazolam                  |
| Analgesia rate for patients aged under 70 years old.                                                    | ≤50mg Pethidine<br>≤100µg Fentanyl |
| Analgesia rate for patients aged 70 or older                                                            | ≤25mg Pethidine<br>≤50µg Fentanyl  |
| Serious complication rate                                                                               | ≤0.5%**                            |
| Number of procedures completed since award of provisional certification                                 | ≥100                               |
| Recommended lifetime procedure count                                                                    | ≥300                               |
| Procedures in previous 3 months                                                                         | ≥15                                |
| Formative DOPyS (level 2)                                                                               | ≥4                                 |
| A level 2 DOPyS records a polyp which is greater than or equal to 10mm in size.                         |                                    |
| 4 most recent formative lower GI DOPyS (level 2) all items scoring 'Competent for independent practice' | 100%                               |
| Polypectomy techniques assessed by DOPyS (level 2) – Stalked polyps                                     | ≥1                                 |
| Polypectomy techniques assessed by DOPyS (level 2) - Small sessile lesions/ EMR                         | ≥1                                 |

**Appendix Table 4:** Criteria for full colonoscopy certification.
